# Supplementary material for: The selective heating effect of microwave irradiation on a binary mixture of water and polyethylene oxide: a molecular dynamics simulation approach
Source: Royal Society of Chemistry journal article supplement (doi:10.1039/d3cp00349c), 2023-01-01
Supplement: d3cp00349c1.pdf [file d3cp00349c1.pdf]

**Manuscript ID: CP-ART-01-2023-000349.R1**

## **Selective Heating Effect of Microwave Irradiation on Binary Mixture of Water and Polyethylene Oxide: Molecular Dynamics Simulation Approach**

Junhe Chen<sup>a</sup>, Matthew J. Warner<sup>b</sup>, Benjamin Sikora<sup>c</sup>, Daniel Kiddle<sup>c</sup>, Danielle Coverdell<sup>c</sup>, Omar Allam<sup>a,d</sup>, Paul A. Kohl<sup>b</sup>, and Seung Soon Jang<sup>a,\*</sup>

<sup>a</sup> School of Materials Science and Engineering, Georgia Institute of Technology, 771 Ferst Drive NW, Atlanta, 30332-0245, USA

<sup>b</sup> School of Chemical & Biomolecular Engineering, Georgia Institute of Technology, 311 Ferst Drive NW, Atlanta, GA 30332-0100, USA

<sup>c</sup> Department of Energy's Kansas City National Security Campus managed by Honeywell, 14520 Botts Road, Kansas City, MO 64147, USA

<sup>d</sup> The George W. Woodruff School of Mechanical Engineering, Georgia Institute of Technology, 801 Ferst Drive NW, Atlanta, Georgia 30332-0405, United States

\* Corresponding authors:

Seung Soon Jang - [seungsoon.jang@mse.gatech.edu](mailto:seungsoon.jang@mse.gatech.edu)

Keywords: microwave, electric field, selective heating, water, polyethylene oxide, molecular dynamics simulation

# SUPPLEMENTAL INFORMATION

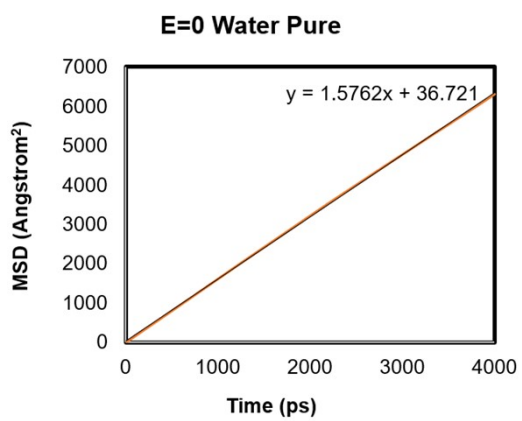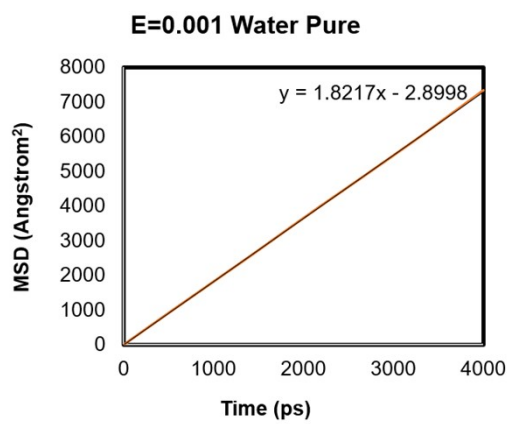

**E=0.01 Water Pure**

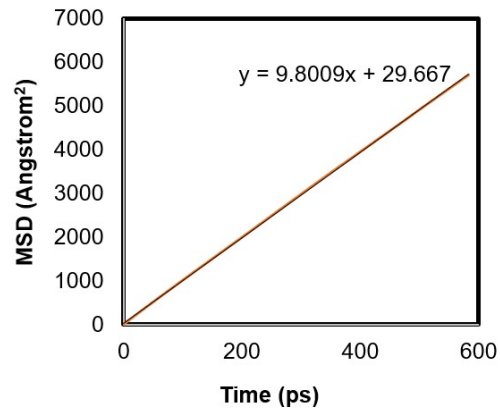

**E=0 PEO20 Pure**

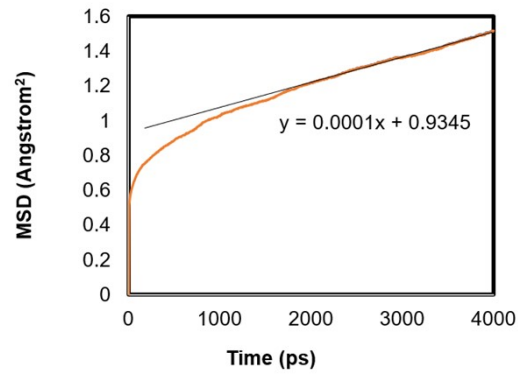

**E=0.001 PEO20 Pure**

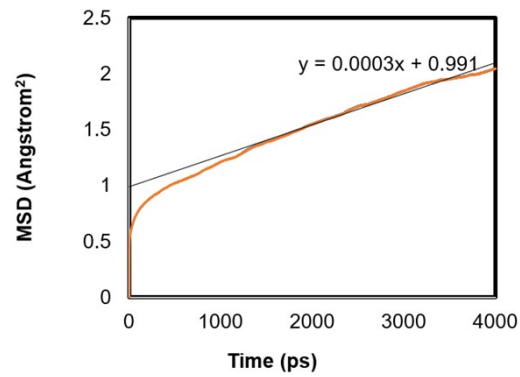

**E=0.01 PEO20 Pure**

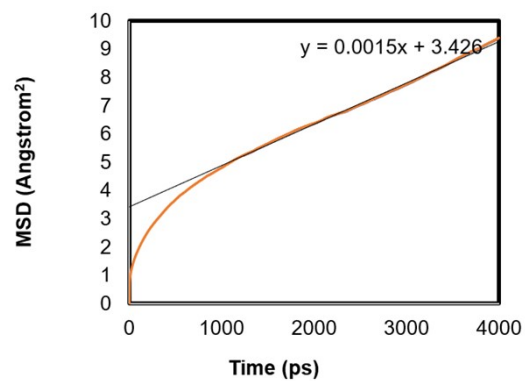

**E=0 Water Mixture**

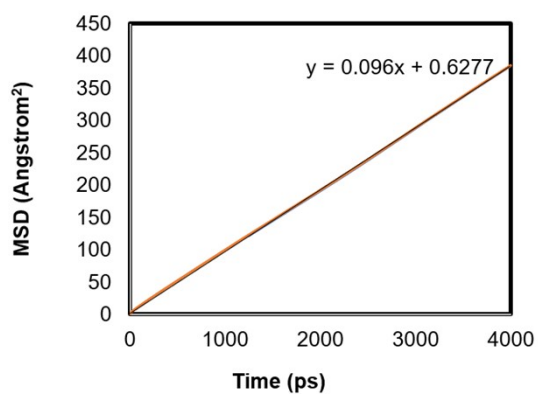

**E=0.001 Water Mixture**

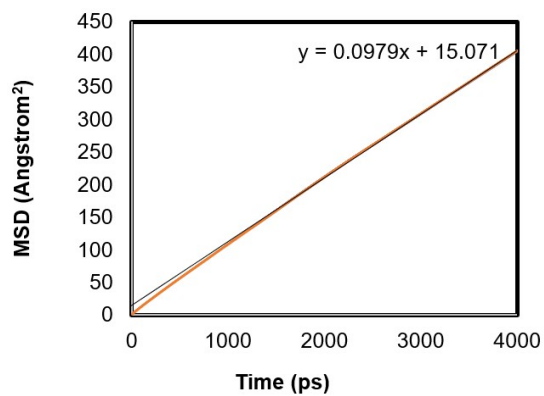

**E=0.01 Water Mixture**

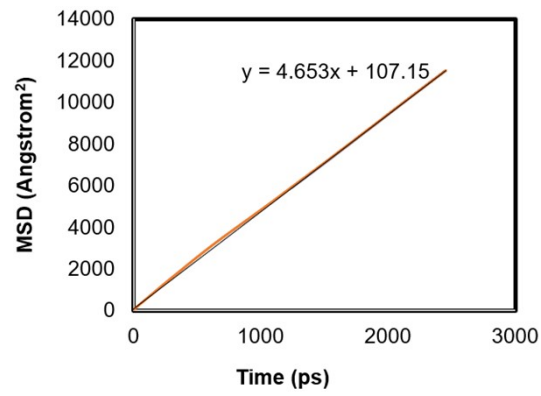

**E=0 PEO20 Mixture**

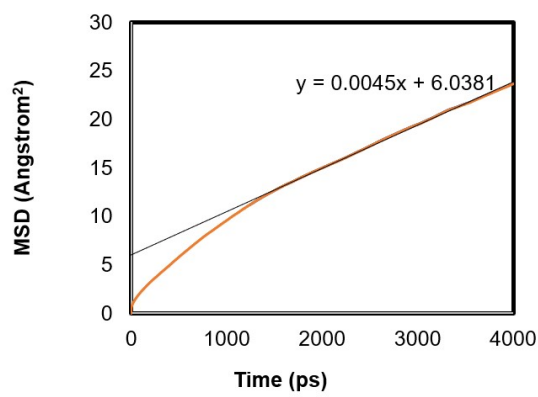

**E=0.001 PEO20 Mixture**

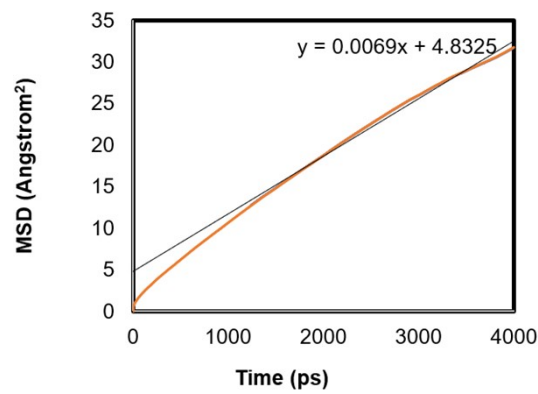

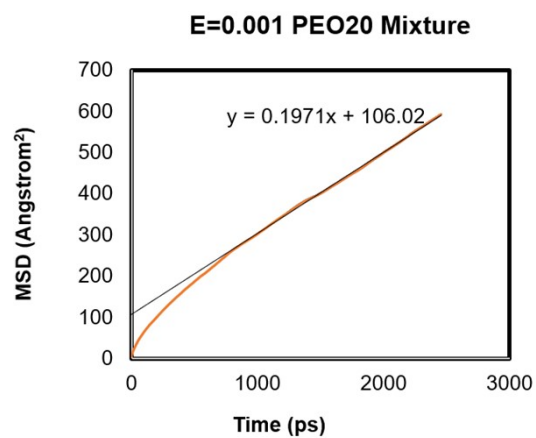

**Figure 1.** Time-dependent MSD and linear fit of water and PEO in their pure system and the mixture under external oscillating electric field with  $E_0 = 0, 0.001 \text{ V/\AA}$  and  $0.01 \text{ V/\AA}$ .
